# Supplementary material for: Global sensitivity analysis, probabilistic calibration, and predictive assessment for the data assimilation linked ecosystem carbon model
Source: Copernicus journal article supplement (doi:10.5194/gmd-8-1899-2015), 2015-07-01
Supplement: Supplementary file 1 [file gmd-8-1899-2015-supplement.zip]

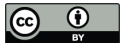

## *Supplement of*

# **Global sensitivity analysis, probabilistic calibration, and predictive assessment for the data assimilation linked ecosystem carbon model**

**C. Safta et al.**

*Correspondence to:* C. Safta (csafta@sandia.gov)

- gmd-8-1899-2015-supplement-cover-letter.pdf
- \_\_MACOSX
  - supmat-gmd-2014-165
    - \* lib
- supmat-gmd-2014-165
  - DISCLAIMER.txt
  - GET\_DATA.txt
  - README.txt
  - RUN.txt
  - config
    - \* config.gnu
    - \* config.intel
  - data
    - \* calendar.txt
    - \* extract\_NEE\_data.sh
    - \* extract\_drivers.sh
    - \* f2.dat
    - \* x1f1.dat
    - \* x2.dat
  - lib
    - \* array
    - \* dalec
    - \* dsfmt
    - \* include
    - \* kde

- \* makefile
- \* mcmc
- \* netlib
- \* spls
- run
  - \* cal
  - \* forUQ
  - \* gsa
- scripts
  - \* cal
  - \* forUQ
  - \* gsa

The copyright of individual parts of the supplement might differ from the CC-BY 3.0 licence.
